# Supplementary material
Source: PubMed Central journal article supplement (PMC7966237)
Supplement: 3987_table.pdf [file 3987_table.pdf]

**On-line Table: Interhypothalamic adhesion case series**

| Case No. | Age    | Sex | Symptom                                  | IHA Size Tr × AP × CC (mm) | Hypothalamic Nuclear Location                                | Midline Anomalies                                                                       | Additional Anomalies                                                      |
|----------|--------|-----|------------------------------------------|----------------------------|--------------------------------------------------------------|-----------------------------------------------------------------------------------------|---------------------------------------------------------------------------|
| 1        | 9 mo   | M   | Cleft lip and palate                     | 3 × 2 × 2                  | Dorsomedial                                                  | Cleft lip and palate, falx hypoplasia, olfactory hypoplasia, hippocampal under-rotation | None                                                                      |
| 2        | 2 mo   | F   | Intrauterine growth restriction, preterm | 2 × 2 × 1                  | Dorsomedial, ventromedial, arcuate                           | Hippocampal under-rotation                                                              | White matter hypoplasia                                                   |
| 3        | 4 yr   | M   | Headache, emesis                         | 6 × 7 × 7                  | Dorsomedial, ventromedial, arcuate                           | Optic pathway volume loss                                                               | White matter injury                                                       |
| 4        | 6 mo   | M   | Cyanosis hypotonia, failure to thrive    | 4 × 5 × 4                  | Dorsomedial, ventromedial                                    | Hippocampal under-rotation                                                              | None                                                                      |
| 5        | 5 yr   | M   | Developmental delay, seizure             | 3 × 3 × 7                  | Dorsomedial, ventromedial, arcuate                           | Hippocampal under-rotation, HD, BPC, CD, BH, falx hypoplasia                            | Malformation of cortical development, periventricular nodular heterotopia |
| 6        | 8 mo   | F   | Lethargy, seizure                        | 3 × 2 × 4                  | Dorsomedial, paraventricular                                 | Hippocampal under-rotation                                                              | None                                                                      |
| 7        | 7 yr   | M   | Headache, emesis                         | 2 × 5 × 6                  | Dorsomedial, ventromedial, arcuate                           | Hippocampal under-rotation, HD                                                          | White matter hypoplasia, white matter injury, deep parietal sulcus        |
| 8        | 14 yr  | F   | Delirium                                 | 3 × 4 × 4                  | Dorsomedial, paraventricular, preoptic                       | None                                                                                    | None                                                                      |
| 9        | 4 mo   | F   | Spasms                                   | 3 × 1 × 2                  | Paraventricular                                              | Hippocampal under-rotation                                                              | White matter hypoplasia                                                   |
| 10       | 2 yr   | F   | Hydrocephalus                            | 4 × 1 × 2                  | Paraventricular                                              | RES, hippocampal under-rotation, CCD                                                    | White matter hypoplasia, Chiari II                                        |
| 11       | 3 days | M   | Cyst                                     | 3 × 3 × 3                  | Dorsomedial, ventromedial, arcuate                           | CCD, hippocampal under-rotation, HD, thick massa intermedia, meningeal cyst             | Periventricular nodular heterotopia, hydrocephalus                        |
| 12       | 3 yr   | F   | Encephalopathy, developmental delay      | 2 × 1 × 2                  | Paraventricular, preoptic                                    | Pineal cyst                                                                             | None                                                                      |
| 13       | 15 yr  | M   | Anosmia, memory deficit                  | 4 × 9 × 10                 | Dorsomedial, ventromedial, arcuate preoptic, paraventricular | CCD, olfactory hypoplasia, pituitary hypoplasia                                         | Periventricular nodular heterotopia                                       |

**Note:**—Tr indicates transverse dimension; AP, anteroposterior dimension; CC, craniocaudal dimension; CD, cerebellar dysgenesis; BH, brain stem hypoplasia; HD, hippocampal dysgenesis; RES, rhombencephalosynapsis; CCD, corpus callosum dysgenesis; BPC, Blake pouch cyst.
